# Supplementary material
Source: Copernicus journal article supplement (doi:10.5194/amt-19-2737-2026)
Supplement: Supplementary file 1 [file amt-19-2737-2026-supplement.pdf]

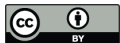

*Supplement of*

## **Super-resolution localization and quantification of SO<sub>2</sub> emissions over India using TROPOMI observations**

**Yutao Chen et al.**

*Correspondence to:* Yutao Chen (yutao.chen@knmi.nl) and Jieying Ding (jieying.ding@knmi.nl)

The copyright of individual parts of the supplement might differ from the article licence.

## S1. The spreading effect led by divergence calculation

Since the data used for the divergence calculation, TROPOMI SO<sub>2</sub> measurements and 2D wind fields, are gridded rather than continuous, we calculate the SO<sub>2</sub> divergence using the second-order central difference method. The total divergence is a superposition of components in both the  $x$  and  $y$  directions; for simplicity, we present the calculation along the  $x$  direction only. Specifically, the SO<sub>2</sub> divergence of grid cell  $i$  in the  $x$  direction can be calculated as follows:

$$D_{x(i)} = \frac{F_{x(i+1)} - F_{x(i-1)}}{2\Delta x} \quad (\text{S1})$$

$$F_{x(i+1)} = w_{x(i+1)} \cdot V_{(i+1)} \quad (\text{S2})$$

$$F_{x(i-1)} = w_{x(i-1)} \cdot V_{(i-1)} \quad (\text{S3})$$

$D_{x(i)}$  is the divergence in grid cell  $i$  calculated along the  $x$  direction.  $F_{x(i)}$  denotes the flux of SO<sub>2</sub> in grid cell  $i$  along the  $x$  direction.  $\Delta x$  is the resolution of the grid-scale.  $w_{x(i)}$  represents the wind in grid cell  $i$  along  $x$  direction.  $V_i$  is SO<sub>2</sub> VCD in grid cell  $i$ . The total divergence for each grid cell equals the sum of the divergence along  $x$  and  $y$  directions.

There is a discretization in this divergence calculation leading to the spreading of the calculated point source emissions. Specifically, Eq. (1) can be rewritten as:

$$D_{x(i)} = \frac{1}{2} \left[ \frac{(F_{x(i+1)} - F_{x(i)})}{\Delta x} + \frac{(F_{x(i)} - F_{x(i-1)})}{\Delta x} \right] \quad (\text{S4})$$

This can further be expressed as:

$$D_{x(i)} = \frac{1}{2} [D_{RE(i)} + D_{LE(i)}], \quad (\text{S5})$$

where  $D_{RE(i)}$  and  $D_{LE(i)}$  denotes the divergence at the right and left edges of grid cell  $i$ , respectively. Hence, the divergence of each grid cell can be viewed as a linear interpolation of the divergence in its surrounding regions. This causes the spreading of point source emissions. We use Eq. (S1) to calculate gridded SO<sub>2</sub> divergence at different spatial resolutions to determine the optimal resolution for emissions, which minimize both spreading effect and the noise level. The target spatial resolutions from coarse to fine are  $0.1^\circ \times 0.1^\circ$ ,  $0.05^\circ \times 0.05^\circ$ ,  $0.025^\circ \times 0.025^\circ$ , and  $0.01^\circ \times 0.01^\circ$ . Table S1 shows the six investigated divergence calculations using the mentioned resolutions and two calculation strategies. Either the divergence is first calculated on the TROPOMI pixels and then interpolated to the target resolution (option 1) or the SO<sub>2</sub> VCD is first interpolated to the target resolution, and then the divergence is calculated (option 2). The SO<sub>2</sub> emission results of these six cases are shown in Fig. S1.

**Table S1. SO<sub>2</sub> emissions on different spatial scales**

| Case name            | Method<br>(1. Divergence calculation on TROPOMI pixels,<br>2. Divergence calculation on regular grid cells) | Spatial resolution |
|----------------------|-------------------------------------------------------------------------------------------------------------|--------------------|
| 0.1°_Regular Grid    | 2                                                                                                           | 0.1° × 0.1°        |
| 0.05°_Regular Grid   | 2                                                                                                           | 0.05° × 0.05°      |
| 0.025°_Regular Grid  | 2                                                                                                           | 0.025° × 0.025°    |
| 0.025°_TROPOMI Pixel | 1                                                                                                           | 0.025° × 0.025°    |
| 0.01°_Regular Grid   | 2                                                                                                           | 0.01° × 0.01°      |
| 0.01°_TROPOMI Pixel  | 1                                                                                                           | 0.01° × 0.01°      |

SO<sub>2</sub> emissions [ $1e^{-8}$  mol m<sup>-2</sup> s<sup>-1</sup>]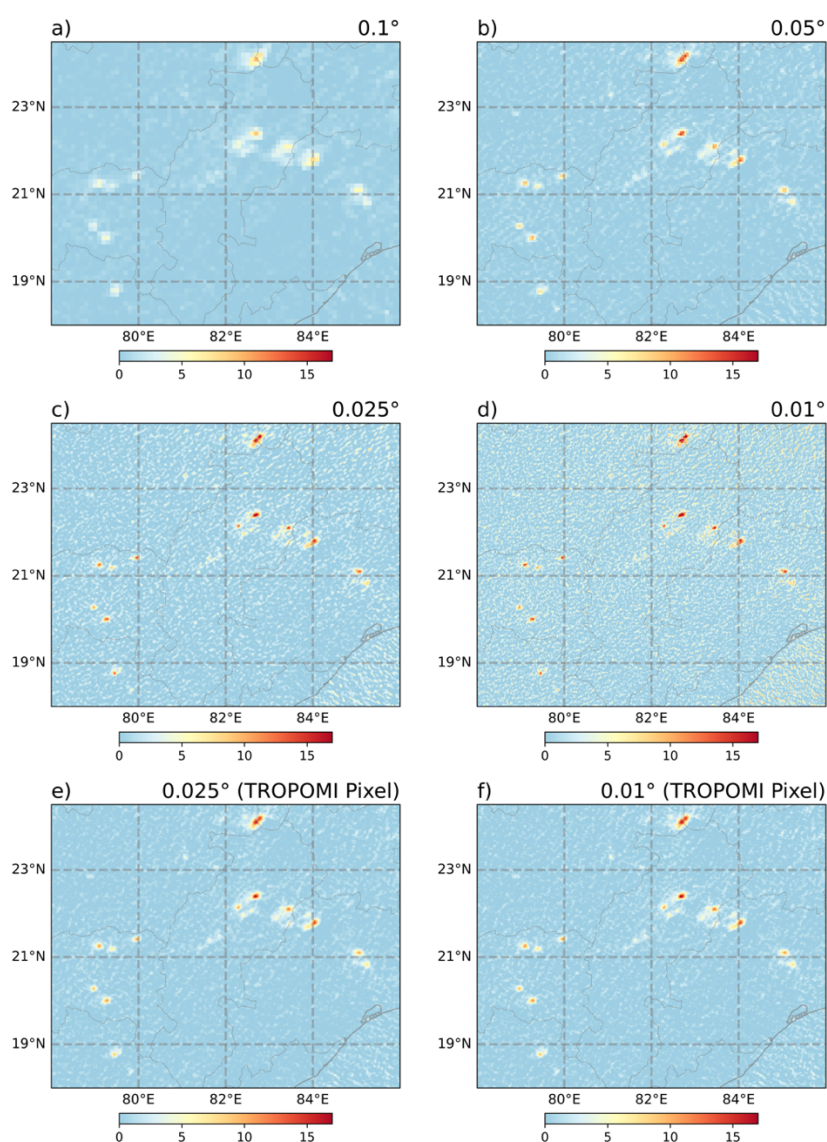**Figure S1. Annual mean SO<sub>2</sub> emissions during December 2022 to November 2023 on different spatial resolutions in a region of India with strong emission sources. The cases are shown for a) 0.1°\_Regular Grid,**

b) 0.05°\_Regular Grid, c) 0.025°\_Regular Grid, d) 0.01°\_Regular Grid, e) 0.025°\_TROPOMI Pixel, and f) 0.01°\_TROPOMI Pixel.

In Fig. S1a-d, the SO<sub>2</sub> divergence is calculated directly on the regular grid in the target resolution. In Fig. S1a-c, as the grid resolution becomes finer, the SO<sub>2</sub> emission map shows more details, indicating the emission resolution also becomes finer. The higher grid resolution can reduce the spreading effect caused by the linear interpolation of divergence calculation and thus improve the emission resolution, while the noise level increases due to the finer resolution. However, when the grid resolution becomes finer than the TROPOMI pixel size, i.e. the grid resolution changes from 0.025° × 0.025° to 0.01° × 0.01° as shown in Fig.S1c and d, the improvement on emission resolution becomes minimal and the noise levels are still increasing. In this case, the TROPOMI pixel size becomes the limiting factor, and further increasing the grid resolution does not improve the effective emission resolution but increase the noise. When the resolution matches the resolution of Fig. S1c (0.025° × 0.025°) and d (0.01° × 0.01°), while the divergence is first calculated on the TROPOMI pixel as shown in Fig. 1e and f, the noise levels are efficiently reduced. The effective emission resolution between Fig. 1e and 1f are comparable, indicating that increasing the grid resolution no longer improves the effective emission resolution in this case. Nonetheless, some spreading of point-source emissions always remains, constrained either by the grid or the TROPOMI pixel size. In our study, we introduce a method to further improve the emission resolution on any given grid cell resolution. Fig. S1e and S1f show less noise compared to Fig. S1c and S1d, making it easier to distinguish point sources from the noise. Since the emission resolution in Fig. S1e (0.025°) and Fig. S1f (0.01°) are similar, we use the SO<sub>2</sub> emissions from Fig. S1e (0.025°) as the baseline in our study

## S2. The Gaussian-shaped function to derive the spreading kernel $B$

Each element in the spreading kernel is calculated based on the following function:

$$f(x) = e^{-\frac{x^2}{2 \cdot \sigma^2}} \quad (S6)$$

With the known sigma, the variable  $x$  (in units of grid cells) is the distance from the center of the grid cell which contains the emission source. Specifically, when  $x = 0$ , it refers to the grid cell containing the point source itself. When  $x = 1$ , it refers to the distance to directly adjacent neighboring grid cells. When  $x = \sqrt{2}$  (approximately 1.414), it refers to the distance to diagonally adjacent grid cells. Additional values of  $x$  represent distances to more distant grid cells, calculated according to their relative positions.

The spreading pattern  $B'$  is defined within a 9 × 9 grid cell area centered on the grid cell containing the point source and is derived from the Eq. S6. The spreading kernel  $B$ , which is used to calculate the sharpening kernel, is the normalized form of  $B'$  and can be expressed as:

$$B = \frac{B'}{\sum_{i=-4}^4 \sum_{j=-4}^4 B'_{ij}} \quad (S7)$$

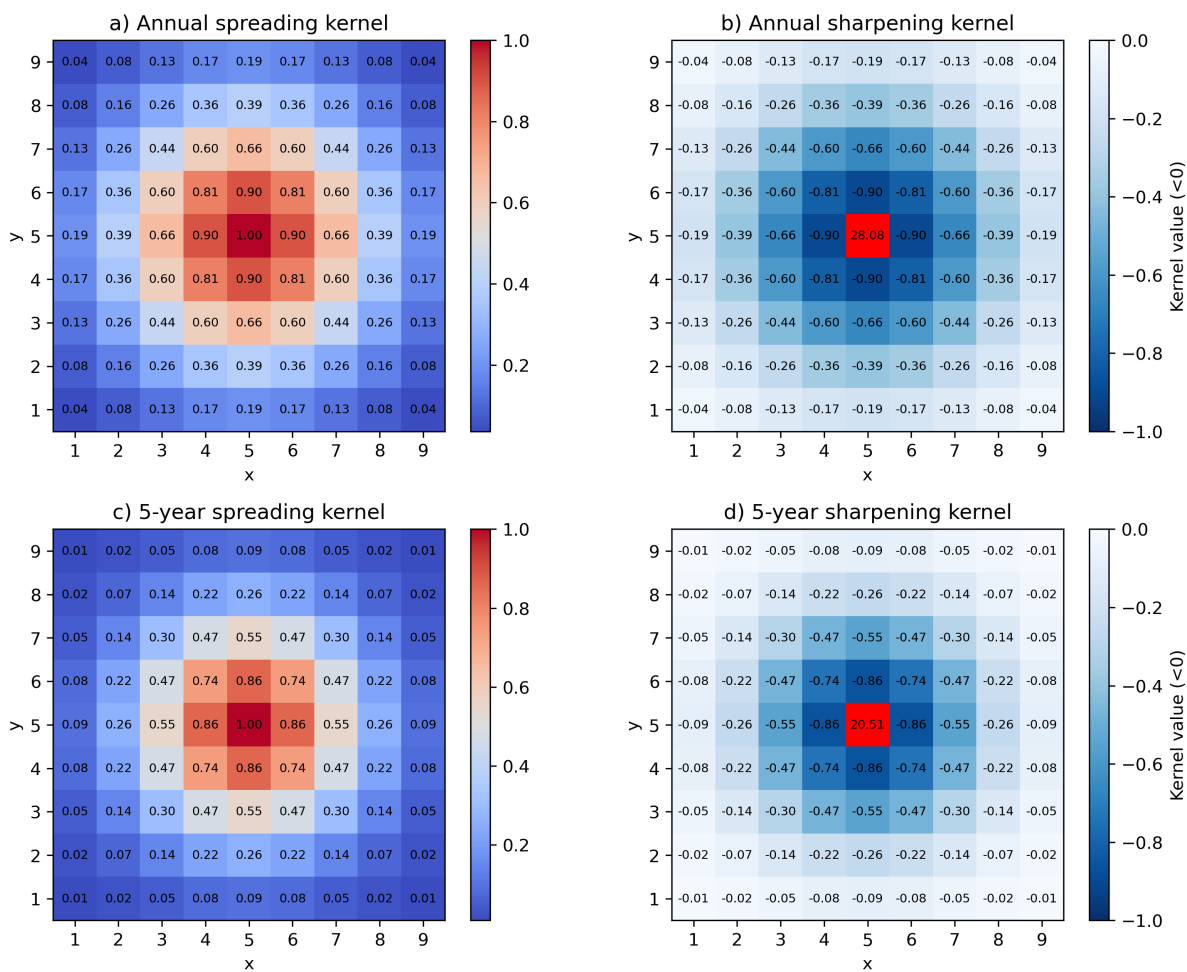

**Figure S2.** The spreading kernel derived from a) annual SO<sub>2</sub> emissions and c) five-year averaged SO<sub>2</sub> emissions. The sharpening kernels c) and d) are derived from their corresponded spreading kernels.

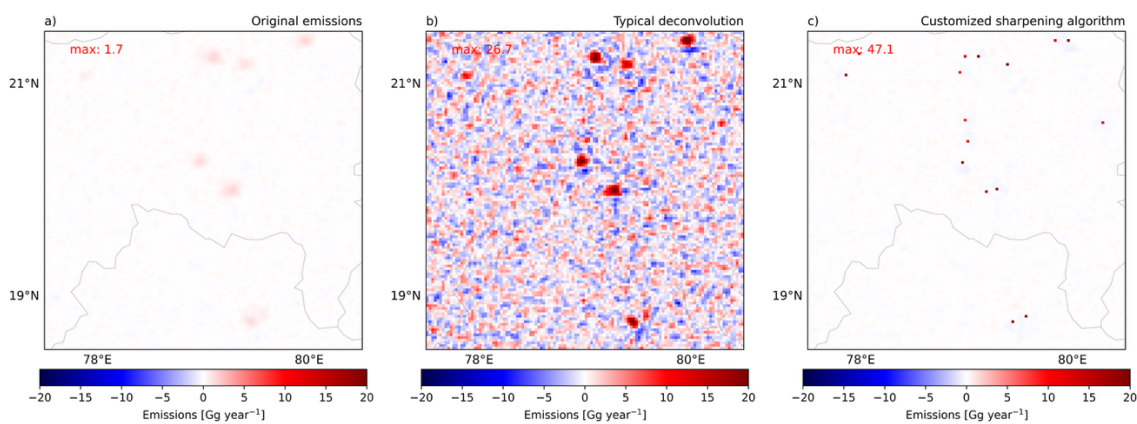

**Figure S3.** SO<sub>2</sub> emissions over a zoom-in region in India. a) Original SO<sub>2</sub> emissions. b) SO<sub>2</sub> emissions after the typical deconvolution. c) SO<sub>2</sub> emissions after customized sharpening algorithm (sharpening applied in descending order of emission).

### S3. The spreading pattern derived from the model-based SO<sub>2</sub> emissions

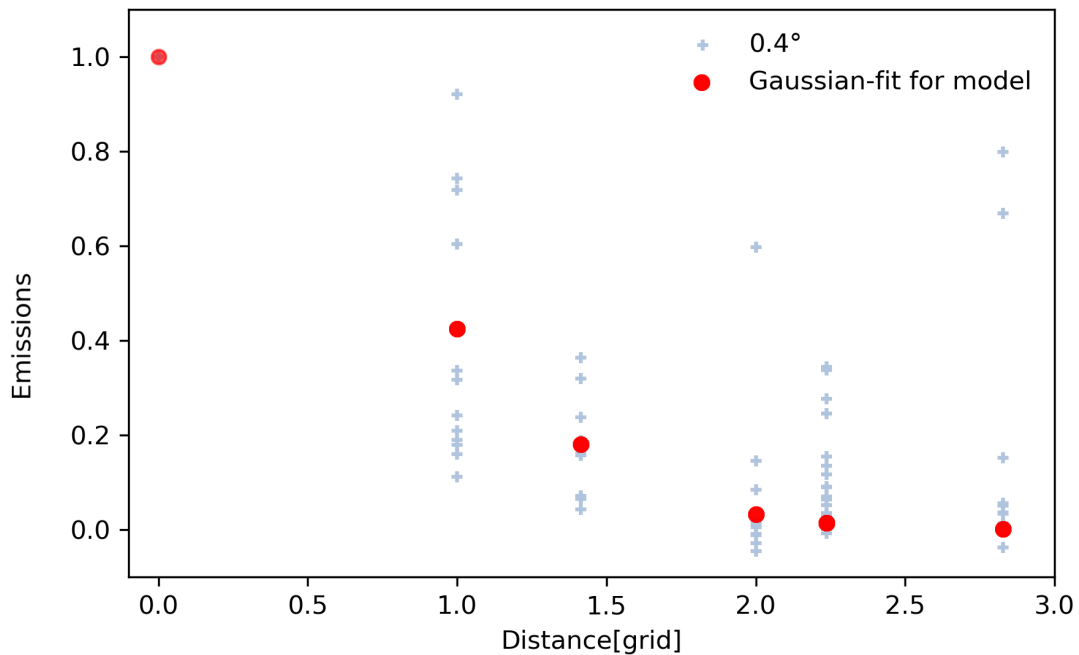

Figure S4. Variation of normalized SO<sub>2</sub> emissions with distance from the point source location, and the corresponding Gaussian-shaped fitting function with the sigma = 0.67. This emission is derived from the annual mean CAMS model results (0.4° × 0.4°). To avoid interference from nearby sources, we selected one isolated point source for this analysis. The point at (0,1) represents the location of the point emissions decrease to near zero within about two grid cells, so we define a 5 × 5 grid cell area centered on the point source as the emission spreading region.

### S4. Point source improvement after sharpening.

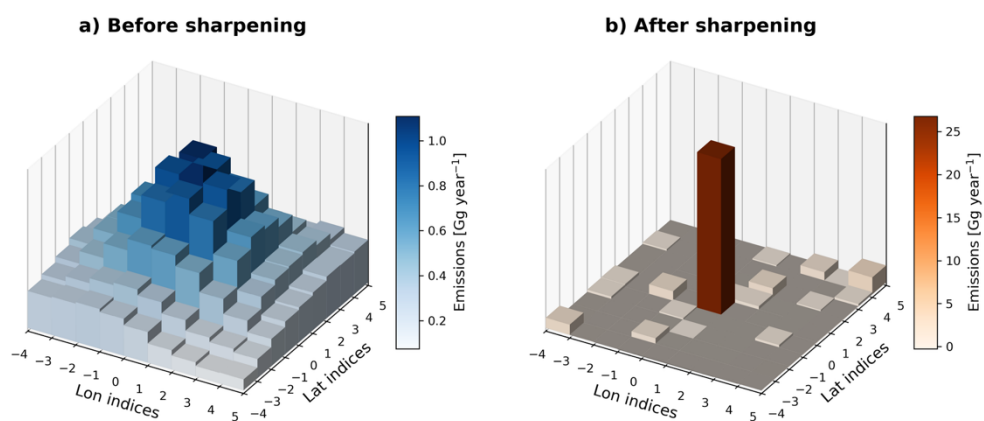

Figure S5. The SO<sub>2</sub> annual emission distribution a) before sharpening and b) after sharpening centered on a point source within a 9 × 9 grid cell area. This figure is based on the average of 38 selected point sources (See Table S2). The emissions before sharpening follows a 2D Gaussian pattern. The emission after sharpening is more concrete at the point source location and is enhanced approximately 28 times compared to the unsharpened case.

**Table S2. Locations of selected SO<sub>2</sub> point source location used in Fig. S3**

| Name                   | Lat     | Lon     |
|------------------------|---------|---------|
| INDRA GANDHI STPP      | 28,4849 | 76,3754 |
| SURATGARH              | 29,179  | 74,0202 |
| VALLUR ntpc/ntecl      | 13,2371 | 80,3023 |
| UNCHAHAR               | 25,9131 | 81,3274 |
| DAMODARAM SANJEEVAIAH  | 14,3444 | 80,1264 |
| SAGARDIGHI TPP         | 24,3696 | 88,1046 |
| YERMARUS TPP           | 16,2949 | 77,3568 |
| RAYAL SEEMA            | 14,704  | 78,4577 |
| BELLARY TPS            | 15,1932 | 76,7195 |
| RAICHUR                | 16,3532 | 77,3422 |
| AKALTARA TPP           | 21,9603 | 82,4091 |
| K_GUDEM NEW            | 17,6219 | 80,6936 |
| DADRI (NCTPP)          | 28,603  | 77,6078 |
| LALITPUR TPP           | 24,7971 | 78,6463 |
| PRYAGRAJ (BARA) TPP    | 25,196  | 81,6594 |
| TALWANDI SABO          | 29,924  | 75,2372 |
| SIMHADRI               | 17,591  | 83,0917 |
| SINGRAULI STPS         | 24,1033 | 82,7068 |
| FARAKKA STPS           | 24,772  | 87,894  |
| CHHABRA TPS            | 24,6217 | 77,0357 |
| MOUDA STPS             | 21,1797 | 79,3978 |
| KAHALGAON              | 25,2349 | 87,2635 |
| KORADI                 | 21,2414 | 79,096  |
| KUDGI                  | 16,4994 | 75,8349 |
| TAMNAR TPP             | 22,0987 | 83,4513 |
| Shri Singaji MALWA TPP | 22,0971 | 76,5317 |
| KORBA STPS             | 22,3881 | 82,6858 |
| R_GUNDEM STPS          | 18,7572 | 79,456  |
| ANPARA                 | 24,201  | 82,7891 |
| CHANDRAPUR_Coal        | 20,0063 | 79,29   |
| SIPAT STPS             | 22,13   | 82,293  |
| RIHAND                 | 24,027  | 82,7915 |
| TALCHER STPS           | 21,0966 | 85,074  |
| TIRORA TPP             | 21,4129 | 79,9671 |
| SASAN UMPP             | 23,9784 | 82,6275 |
| MUNDRA UMPP            | 22,8158 | 69,5281 |
| MUNDRA TPP             | 22,823  | 69,5532 |
| VINDH_CHAL STPS        | 24,0983 | 82,6719 |

**Table S3 Locations of selected SO<sub>2</sub> point source location used in Fig. 7**

| Name                    | Lat     | Lon     |
|-------------------------|---------|---------|
| DURGAPUR STEEL TPS      | 23.58   | 87.2043 |
| MARWA TPP               | 22.0708 | 82.6022 |
| MEJIA TPS EXT           | 23.4639 | 87.1311 |
| TUTICORIN JV            | 8.7603  | 78.1699 |
| VIZAG TPP               | 17.5635 | 83.1382 |
| BAKRESWAR               | 23.8285 | 87.4513 |
| KAMALANGA               | 20.87   | 85.2671 |
| MAITHON RB TPP          | 23.8209 | 86.76   |
| TUTICORIN               | 8.7635  | 78.1753 |
| JALLIPPA KAPURDI TPP    | 25.8888 | 71.3236 |
| KAKATIYA TPP            | 18.3835 | 79.8265 |
| UKAI_Coal               | 21.2093 | 73.5574 |
| PARICHA                 | 25.5124 | 78.7588 |
| PARLI                   | 18.8685 | 76.5254 |
| ANAPARA "C"             | 24.2007 | 82.8    |
| ANUPUR TPP              | 23.0655 | 81.7865 |
| BARADARHA TPP           | 21.9114 | 83.1889 |
| DERANG                  | 21.1238 | 84.9843 |
| MAHAN TPP               | 24.0077 | 82.4172 |
| NORTH CHENNAI EXTENSION | 13.245  | 80.3257 |
| RAJIV GANDHI TPS HISAR  | 29.356  | 75.869  |
| ROSA TPP PH - 1         | 27.818  | 79.936  |
| SALAYA TPP              | 22.3049 | 69.7101 |
| SINGARENI TPP           | 18.8372 | 79.5748 |
| BHUSAWAL                | 21.0483 | 75.8425 |
| KOTA                    | 25.1712 | 75.8171 |
| KOLAGHAT                | 22.4157 | 87.8713 |
| VIJAYWADA               | 16.5984 | 80.537  |
| BARH STPP II            | 25.4865 | 85.7452 |
| KAWAI TPP               | 24.7773 | 76.737  |
| MAHATMA GANDHI TPP      | 28.49   | 76.351  |
| NIGRI                   | 24.15   | 81.9045 |
| PAINAMPURAM             | 14.3512 | 80.1431 |
| SEMBCORP GAYATRI        | 14.351  | 80.1443 |
| KORBA-WEST              | 22.4118 | 82.6888 |
| K_KHEDA II              | 21.2818 | 79.116  |
| MEJIA                   | 23.4639 | 87.1311 |
| SANJAY GANDHI           | 23.3026 | 81.0668 |
| AMARAVATI TPP           | 21.0782 | 77.9009 |
| RAIKHEDA                | 21.4499 | 81.8525 |

|                        |         |         |
|------------------------|---------|---------|
| RAJPURA TPP            | 30.557  | 76.577  |
| UCHPINDA TPP           | 21.8858 | 83.1215 |
| NEYVELI ST II          | 11.5576 | 79.4417 |
| WANAKBORI              | 22.8725 | 73.3588 |
| INDRA GANDHI STPP      | 28.4849 | 76.3754 |
| SURATGARH              | 29.179  | 74.0202 |
| VALLUR ntpc/ntec1      | 13.2371 | 80.3023 |
| UNCHAHAR               | 25.9131 | 81.3274 |
| DAMODARAM SANJEEVAIAH  | 14.3444 | 80.1264 |
| SAGARDIGHI TPP         | 24.3696 | 88.1046 |
| YERMARUS TPP           | 16.2949 | 77.3568 |
| RAYAL SEEMA            | 14.704  | 78.4577 |
| BELLARY TPS            | 15.1932 | 76.7195 |
| RAICHUR                | 16.3532 | 77.3422 |
| AKALTARA TPP           | 21.9603 | 82.4091 |
| K_GUDEM NEW            | 17.6219 | 80.6936 |
| DADRI (NCTPP)          | 28.603  | 77.6078 |
| LALITPUR TPP           | 24.7971 | 78.6463 |
| PRYAGRAJ (BARA) TPP    | 25.196  | 81.6594 |
| TALWANDI SABO          | 29.924  | 75.2372 |
| SIMHADRI               | 17.591  | 83.0917 |
| SINGRAULI STPS         | 24.1033 | 82.7068 |
| FARAKKA STPS           | 24.772  | 87.894  |
| CHHABRA TPS            | 24.6217 | 77.0357 |
| MOUDA STPS             | 21.1797 | 79.3978 |
| KAHALGAON              | 25.2349 | 87.2635 |
| KORADI                 | 21.2414 | 79.096  |
| KUDGI                  | 16.4994 | 75.8349 |
| TAMNAR TPP             | 22.0987 | 83.4513 |
| Shri Singaji MALWA TPP | 22.0971 | 76.5317 |
| KORBA STPS             | 22.3881 | 82.6858 |
| R_GUNDEM STPS          | 18.7572 | 79.456  |
| ANPARA                 | 24.201  | 82.7891 |
| CHANDRAPUR_Coal        | 20.0063 | 79.29   |
| SIPAT STPS             | 22.13   | 82.293  |
| RIHAND                 | 24.027  | 82.7915 |
| TALCHER STPS           | 21.0966 | 85.074  |
| TIRORA TPP             | 21.4129 | 79.9671 |
| SASAN UMPP             | 23.9784 | 82.6275 |
| MUNDRA UMPP            | 22.8158 | 69.5281 |
| MUNDRA TPP             | 22.823  | 69.5532 |
| VINDH_CHAL STPS        | 24.0983 | 82.6719 |

## S6. Noise level and detection threshold

The noise levels for one-year annual emissions and five-year averaged emissions are different. To quantify the noise, we selected a clean ocean region without SO<sub>2</sub> emissions (5°–18° N, 85°–90° E). The emission signal within this region was treated as noise. For the annual emissions, the frequency distribution of the noise in the selected clean region approximates a normal distribution with a standard deviation of  $\sigma = 0.125 \text{ Gg yr}^{-1}$ . To avoid inflating the noise level, we define the noise threshold as three times  $\sigma$  ( $3\sigma$ ), corresponding to  $0.38 \text{ Gg yr}^{-1}$  per grid cell. In our case, the sharpening procedure increases the signal in the central grid cell by approximately a factor of 28. Therefore, the detection threshold for the annual sharpened emission map is  $10 \text{ Gg year}^{-1}$ . For the five-year averaged emissions,  $\sigma$  is  $0.06 \text{ Gg yr}^{-1}$ , yielding a  $3\sigma$  noise level of  $0.17 \text{ Gg year}^{-1}$ . The sharpening leads to an enhancement factor of approximately 20, resulting in a detection threshold of  $3.4 \text{ Gg year}^{-1}$  for the five-year averaged emissions.

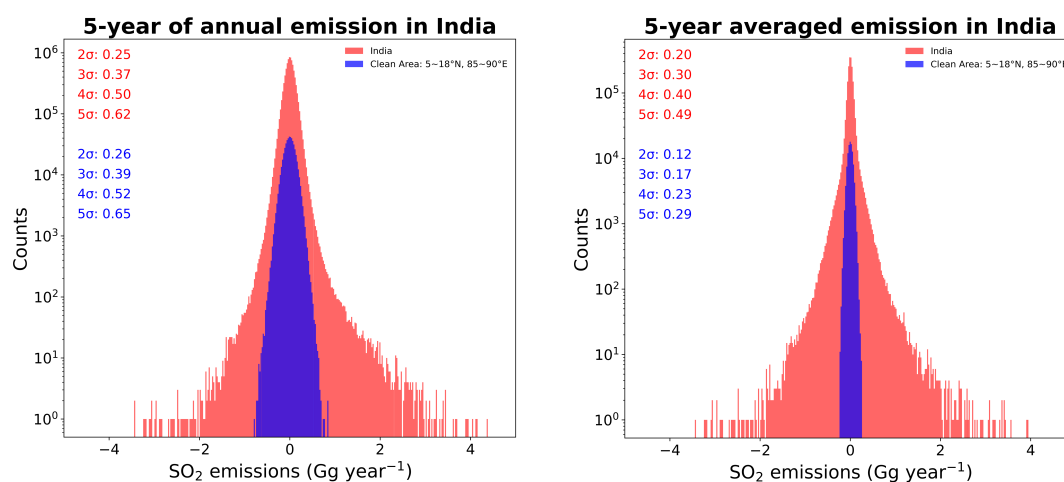

**Figure S6.** Histogram of the frequency of SO<sub>2</sub> emissions. The red bars represent the frequency of SO<sub>2</sub> emissions within the simulation domain. The blue bars denote the frequency of SO<sub>2</sub> emissions (or the noise) in the selected clean oceanic region (latitude: 5°N-18°N; longitude: 85°E-90°E). The left panel is derived from the annual emissions, and the right panel is derived from the five-year averaged emissions.
